# Supplementary material for: Novel iridium complexes as yellow phosphorescent emitters for single-layer yellow and white polymer light-emitting diodes
Source: Royal Society of Chemistry journal article supplement (doi:10.1039/c6tc01922f), 2016-01-01
Supplement: c6tc01922f1.pdf [file c6tc01922f1.pdf]

## Supporting Information

### Novel Iridium Complexes as Yellow Phosphorescent Emitters for Single-Layer Yellow and White Polymer Light-Emitting Diodes

Aihui Liang,<sup>a\*</sup> Gui Huang,<sup>a</sup> Sheng Dong,<sup>b</sup> Xiaoyan Zheng,<sup>c</sup> Jia Zhu,<sup>a</sup> Zhiping Wang,<sup>a</sup> Wenjin Wu,<sup>a</sup> Jie Zhang<sup>b</sup> and Fei Huang<sup>b\*</sup>

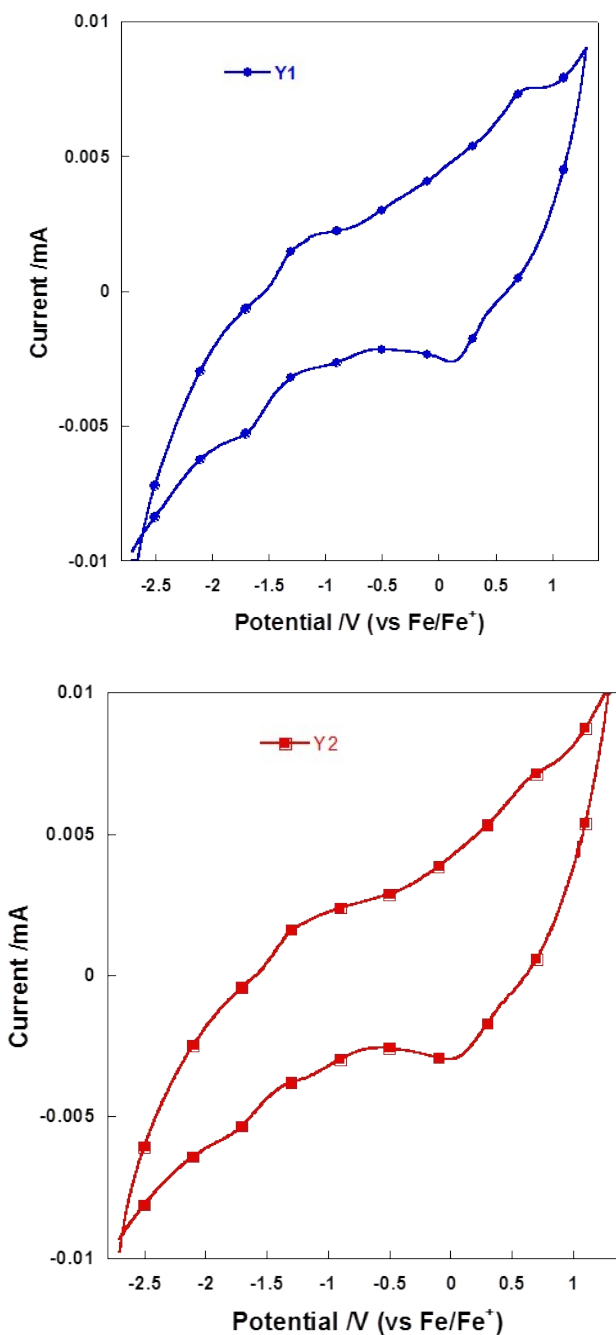

Figure S1. CV curves of iridium complexes Y1 and Y2 in THF.
